# Supplementary material for: Synthesis and organic field effect transistor properties of isoindigo/DPP-based polymers containing a thermolabile group
Source: Royal Society of Chemistry journal article supplement (doi:10.1039/c7ra01726j), 2017-01-01
Supplement: c7ra01726j1.pdf [file c7ra01726j1.pdf]

## Electronic Supplementary Information

# Synthesis and Organic Field Effect Transistor properties of Isoindigo/DPP based polymers containing a thermo labile group

Mohamed Shaker<sup>II,a,b</sup>, Jong-Hoon Lee<sup>I,a</sup>, Byoungwook Park<sup>I,a</sup>, Wonbin kim<sup>a</sup>, Cuc Kim Trinh<sup>a</sup>, Hong Joon Lee<sup>a</sup>, Jin woo Choi<sup>a</sup>, Heejoo Kim<sup>a</sup>, Kwanghee Lee<sup>\*a</sup>, and Jae-Suk Lee<sup>\*a</sup>

<sup>a</sup> School School of Materials Science & Engineering, Research Institute for Solar and Sustainable Energies (RISE), Heeger Center for Advanced Materials (HCAM), and Advanced Photonics Research Institute, Gwangju Institute of Science and Technology, Gwangju 500-712, Korea.

<sup>b</sup> Chemistry department, Faculty of Science, Tanta University, Tanta 31527, Egypt.

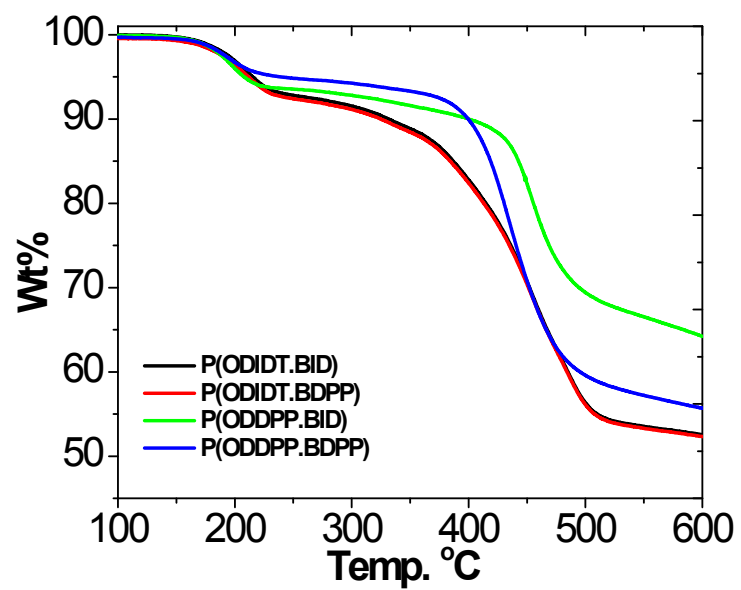

**Fig. S1.** The thermogravimetric analysis (TGA) of random copolymers under study.

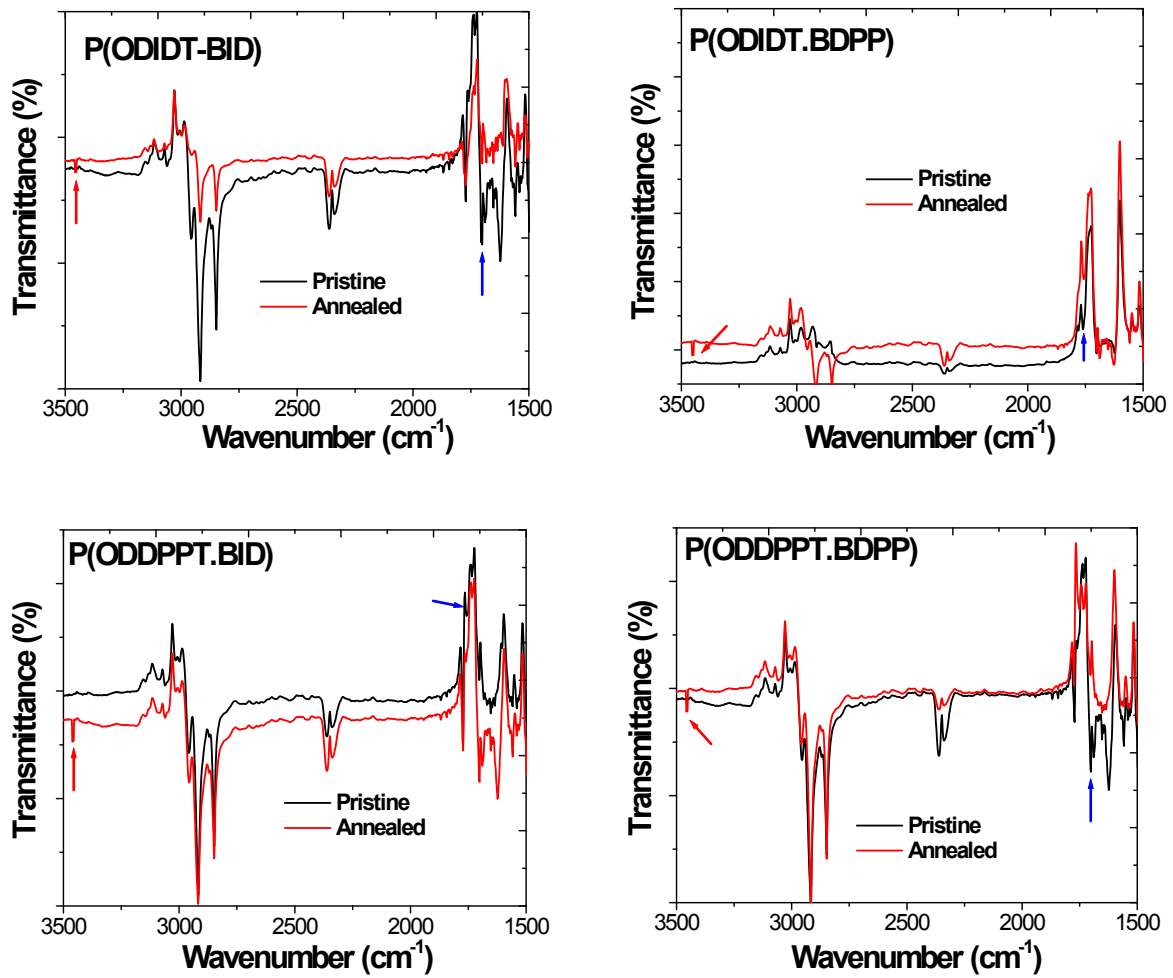

Fig. S2. FT-IR spectra for the pristine films and after thermal treatment for copolymers

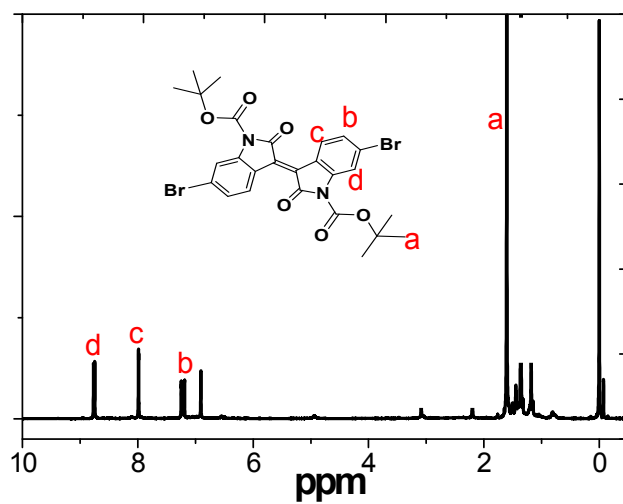

**Fig. S3.** <sup>1</sup>H NMR spectrum of (E)-tert-butyl 6-bromo-3-(6-bromo-1-(tert-butoxycarbonyl)-2-oxoindolin-3-ylidene)-2-oxoindoline-1-carboxylate (2)

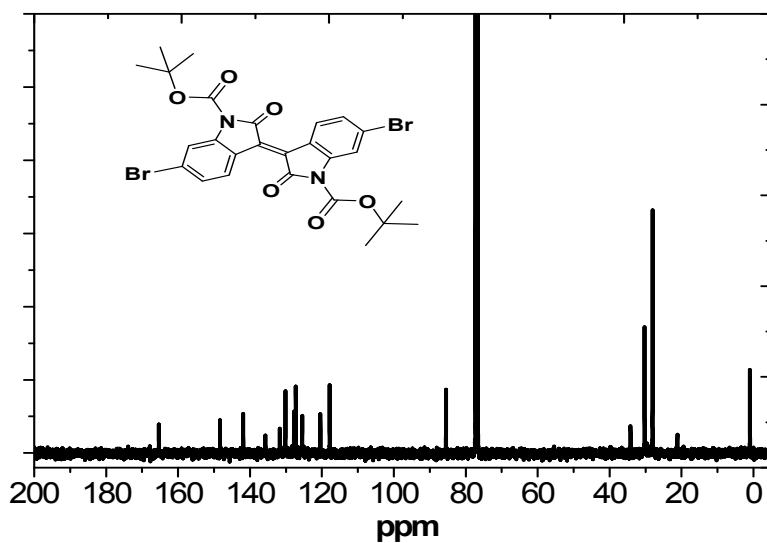

**Fig. S4.** <sup>13</sup>C NMR spectrum of (E)-tert-butyl 6-bromo-3-(6-bromo-1-(tert-butoxycarbonyl)-2-oxoindolin-3-ylidene)-2-oxoindoline-1-carboxylate (2)

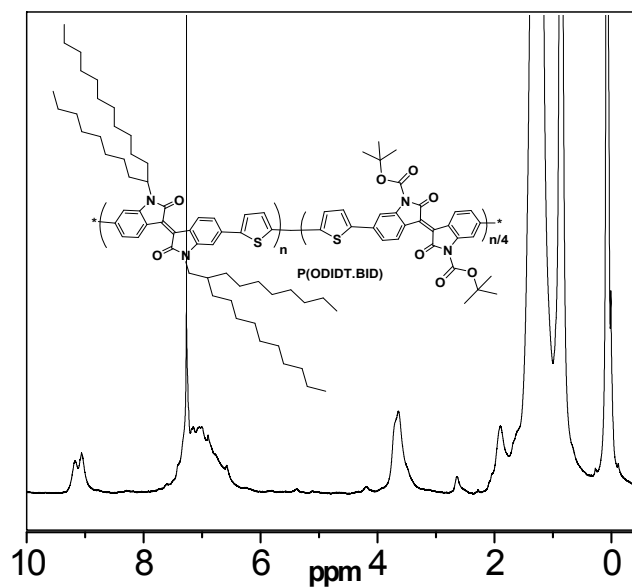

**Fig. S5.**  $^1\text{H}$  NMR spectrum of poly((E)-tert-butyl 3-(1-(tert-butoxycarbonyl)-2-oxo-6-(thiophen-2-yl)indolin-3-ylidene)-6-(5-((E)-1-(2-octyldodecyl)-3-(1-(2-octyldodecyl)-2-oxoindolin-3-ylidene)-2-oxoindolin-6-yl)thiophen-2-yl)-2-oxoindoline-1-carboxylate) P(ODIDT.BID)

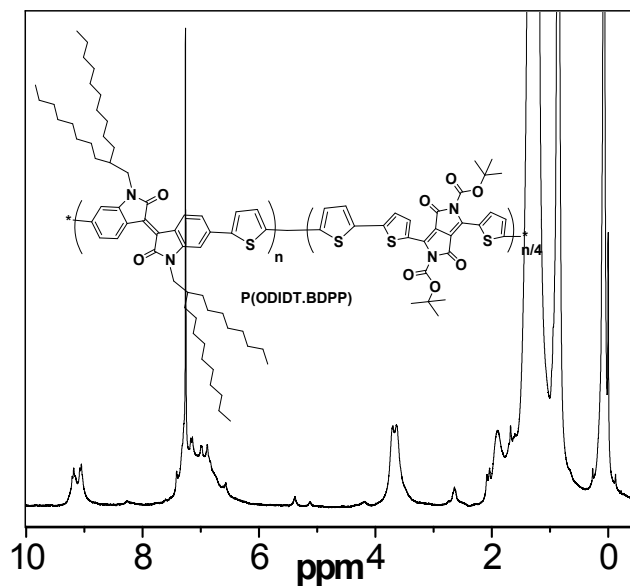

**Fig. S6.**  $^1\text{H}$  NMR spectrum of poly((E)-di-tert-butyl 3-(5-(5-(1-(2-octyldodecyl)-3-(1-(2-octyldodecyl)-2-oxoindolin-3-ylidene)-2-oxoindolin-6-yl)thiophen-2-yl)thiophen-2-yl)-1,4-dioxo-6-(5-(thiophen-2-yl)thiophen-2-yl)pyrrolo[3,4-c]pyrrole-2,5(1H,4H)-dicarboxylate) P(ODIDT.BDPP)

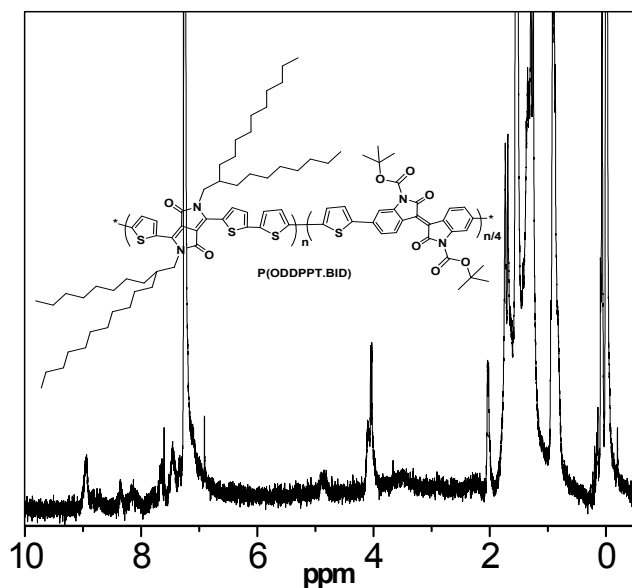

**Fig. S7.** <sup>1</sup>H NMR spectrum of poly((E)-tert-butyl 6-(5-(5-(2,5-bis(2-octyldodecyl)-3,6-dioxo-4-(thiophen-2-yl)-2,3,5,6-tetrahydropyrrolo[3,4-c]pyrrol-1-yl)thiophen-2-yl)thiophen-2-yl)-3-(1-(tert-butoxycarbonyl)-2-oxo-6-(thiophen-2-yl)indolin-3-ylidene)-2-oxoindoline-1-carboxylate) P(ODDPPT.BID)

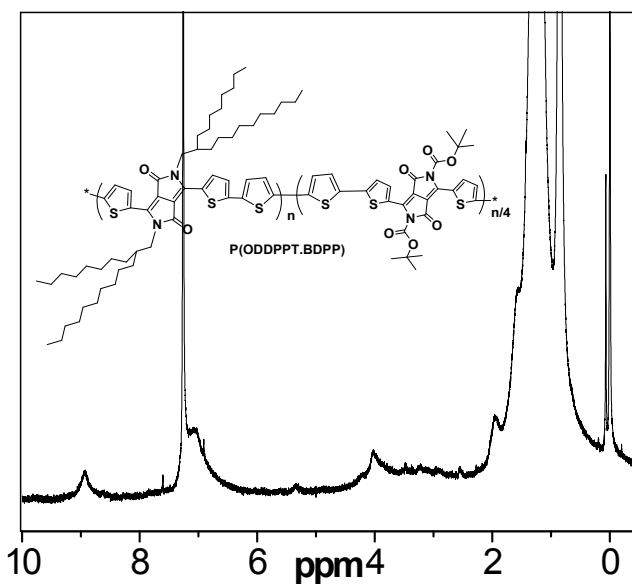

**Fig. S8.** <sup>1</sup>H NMR spectrum of poly(di-tert-butyl 3-(5-(5-(5-(2,5-bis(2-octyldodecyl)-3,6-dioxo-4-(thiophen-2-yl)-2,3,5,6-tetrahydropyrrolo[3,4-c]pyrrol-1-yl)thiophen-2-yl)thiophen-2-yl)thiophen-2-yl)-1,4-dioxo-6-(5-(thiophen-2-yl)thiophen-2-yl)pyrrolo[3,4-c]pyrrole-2,5(1H,4H)-dicarboxylate) P(ODDPPT.BDPP)
